# Supplementary material for: Microbiota Imbalance Contributes to COPD Deterioration by Enhancing IL-17a Production via miR-122 and miR-30a
Source: PubMed Central journal article supplement — Mol Ther Nucleic Acids. 2020 Sep 23;22:520–9. doi: 10.1016/j.omtn.2020.09.017 (PMC7558803; doi:10.1016/j.omtn.2020.09.017), 2020-09-23
Supplement: mmc1.pdf [file mmc1.pdf]

**OMTN, Volume 22**

**Supplemental Information**

**Microbiota Imbalance Contributes  
to COPD Deterioration by Enhancing  
IL-17a Production via miR-122 and miR-30a**

**Ke Zhu, Sijing Zhou, Aiqun Xu, Li Sun, Min Li, Huihui Jiang, Binbin Zhang, Daxiong Zeng, Guanghe Fei, and Ran Wang**

Table S1. Primers used for real-time PCR

| Gene Name             | Forward Primer Sequence | Reverse Primer Sequence |
|-----------------------|-------------------------|-------------------------|
| miR-10a               | CCTGTAGATCCGAATTTG      | AACATGTCTGCGTATCTC      |
| miR-26a               | CAAGTAATCCAGGATAGG-     | AACATGTCTGCGTATCTC      |
| miR-30a               | AACATCCTCGACTGGAA       | AACATGTCTGCGTATCTC      |
| miR-34c               | GGCAGTGTAGTTAGCTG       | AACATGTCTGCGTATCTC      |
| miR-99b               | CCGTAGAACCGACCTTG       | AACATGTCTGCGTATCTC      |
| miR-122a              | GGAGTGTGACAATGGTG       | AACATGTCTGCGTATCTC      |
| miR-123               | CATTATTACTTTTGGTACGC    | AACATGTCTGCGTATCTC      |
| miR-124a              | TTCACAGCGGACCTTGA       | AACATGTCTGCGTATCTC      |
| miR-125a              | CCTGAGACCCTTTAACC       | AACATGTCTGCGTATCTC      |
| miR-140s <sup>b</sup> | CAGTGGTTTTACCCTATG      | AACATGTCTGCGTATCTC      |
| miR-145               | GTCCAGTTTTCCAGGA        | AACATGTCTGCGTATCTC      |
| miR-146               | GAGAACTGAATTCCATGG      | AACATGTCTGCGTATCTC      |
| miR-191               | CGGAATCCCAAAGCAG        | AACATGTCTGCGTATCTC      |
| miR-192               | GACCTATGAATTGACAGC      | AACATGTCTGCGTATCTC      |
| miR-219               | GATTGTCCAAACGCAATTCT    | AACATGTCTGCGTATCTC      |
| miR-222               | CTCAGTAGCCAGTGTAG       | AACATGTCTGCGTATCTC      |
| miR-223               | CGTGTATTTGACAAGCTG      | AACATGTCTGCGTATCTC      |
| IL17a                 | CGGACTGTGATGGTCAACCTGA  | GCACTTTGCCTCCCAGATCACA  |
| 5S                    | CTCGCTTCGGCAGCACAT      | TTTGCGTGTCATCCTTGCG     |
| GAPDH                 | GTCTCCTCTGACTTCAACAGCG  | ACCACCCTGTTGCTGTAGCCAA  |
